# Supplementary material for: Effects of Cations on HPTS Fluorescence and Quantification of Free Gadolinium Ions in Solution; Assessment of Intracellular Release of Gd3+ from Gd-Based MRI Contrast Agents
Source: MDPI journal article supplement (doi:10.3390/molecules27082490), 2022-04-12
Supplement: s1 [file s1]

Article

# Effects of Cations on HPTS Fluorescence and Quantification of Free Gadolinium Ions in Solution; Assessment of Intracellular Release of Gd<sup>3+</sup> from Gd-Based MRI Contrast Agents

Angelo Scarciglia, Enza Di Gregorio \*, Silvio Aime and Giuseppe Ferrauto

Molecular Imaging Center, Department of Molecular Biotechnologies and Health Sciences, University of Torino (IT), Via Nizza 52, 10126 Turin, Italy; angelo.scarciglia@edu.unito.it (A.S.); silvio.aime@unito.it (S.A.); giuseppe.ferrauto@unito.it (G.F.)

\* Correspondence: enza.digregorio@unito.it; Tel.: +39-0116708459

**Table S1.** Parameters of the sigmoidal fitting for pH variation in different media

|                       |                | Value                  | Standard Error        |
|-----------------------|----------------|------------------------|-----------------------|
| <b>HEPES</b>          | A1             | $1.49 \times 10^5$     | $2.23 \times 10^6$    |
|                       | A2             | $7.87 \times 10^7$     | $5.07 \times 10^5$    |
|                       | x0             | 7.04                   | $0.89 \times 10^{-2}$ |
|                       | dx             | 0.44                   | $0.73 \times 10^{-2}$ |
|                       | R <sup>2</sup> | 0.99852                |                       |
| <b>H<sub>2</sub>O</b> | A1             | $1.56 \times 10^5$     | $8.92 \times 10^5$    |
|                       | A2             | $6.61 \times 10^7$     | $1.96 \times 10^6$    |
|                       | x0             | 7.87                   | $0.39 \times 10^{-1}$ |
|                       | dx             | 0.40                   | 0.04                  |
|                       | R <sup>2</sup> | 0.99701                |                       |
| <b>BSA</b>            | A1             | $-1.48 \times 10^{-5}$ | $4.76 \times 10^4$    |
|                       | A2             | $5.89 \times 10^7$     | $8.65 \times 10^5$    |
|                       | x0             | 7.75                   | 0.03                  |
|                       | dx             | 0.55                   | 0.02                  |
|                       | R <sup>2</sup> | 0.99907                |                       |

|                |                                           | Value                    | Standard Error        |
|----------------|-------------------------------------------|--------------------------|-----------------------|
| HEPES/NaCl     | A1                                        | -2.89x10 <sup>5</sup>    | 4.76x10 <sup>5</sup>  |
|                | A2                                        | 7.41x10 <sup>7</sup>     | 8.65x10 <sup>5</sup>  |
|                | x0                                        | 7.78                     | 0.27x10 <sup>-1</sup> |
|                | dx                                        | 0.42                     | 0.02                  |
| R <sup>2</sup> |                                           | 0.99981                  |                       |
| NaCl           | A1                                        | -1.24971x10 <sup>6</sup> | 2.89x10 <sup>6</sup>  |
|                | A2                                        | 7.38x10 <sup>7</sup>     | 3.33x10 <sup>6</sup>  |
|                | x0                                        | 7.15                     | 0.08                  |
|                | dx                                        | 0.57                     | 0.08                  |
| R <sup>2</sup> |                                           | 0.98655                  |                       |
| PBS            | A1                                        | 3.65x10 <sup>6</sup>     | 1.58x10 <sup>6</sup>  |
|                | A2                                        | 7.21x10 <sup>7</sup>     | 3.48x10 <sup>5</sup>  |
|                | x0                                        | 7.15                     | 0.24x10 <sup>-1</sup> |
|                | dx                                        | 0.44                     | 1.46x10 <sup>-2</sup> |
| R <sup>2</sup> |                                           | 0.99957                  |                       |
| EQUATION       | $y=(A2 + (A1-A2)) / (1+ e^{((x-x0)/dx)})$ |                          |                       |

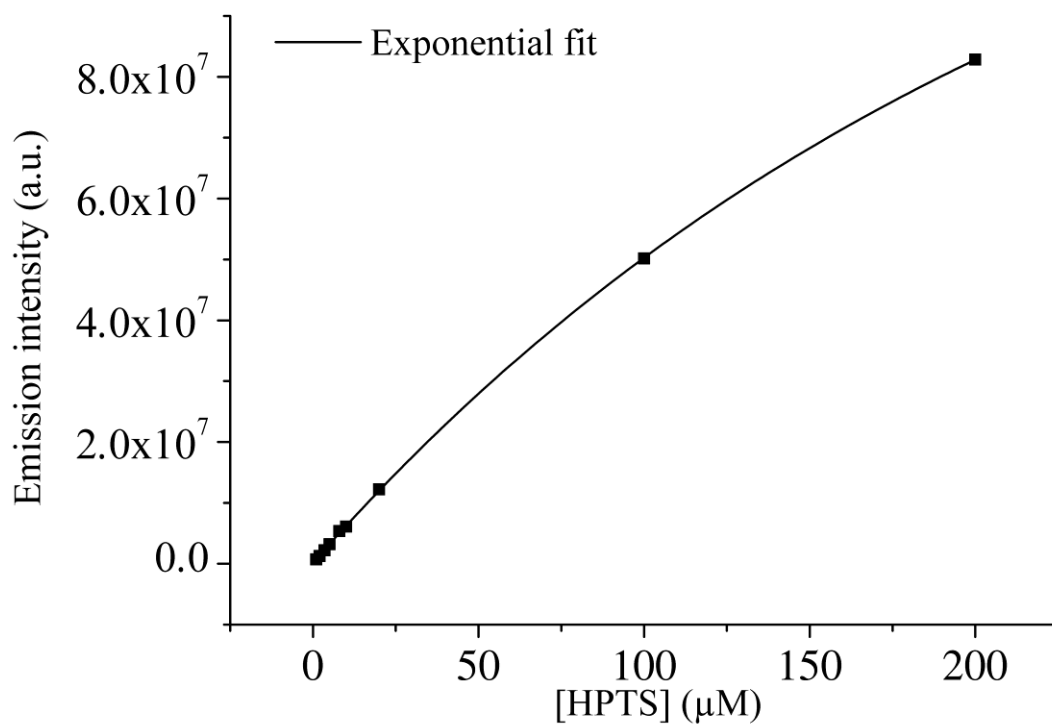

Figure S1. Exponential fit on variable HPTS concentration.

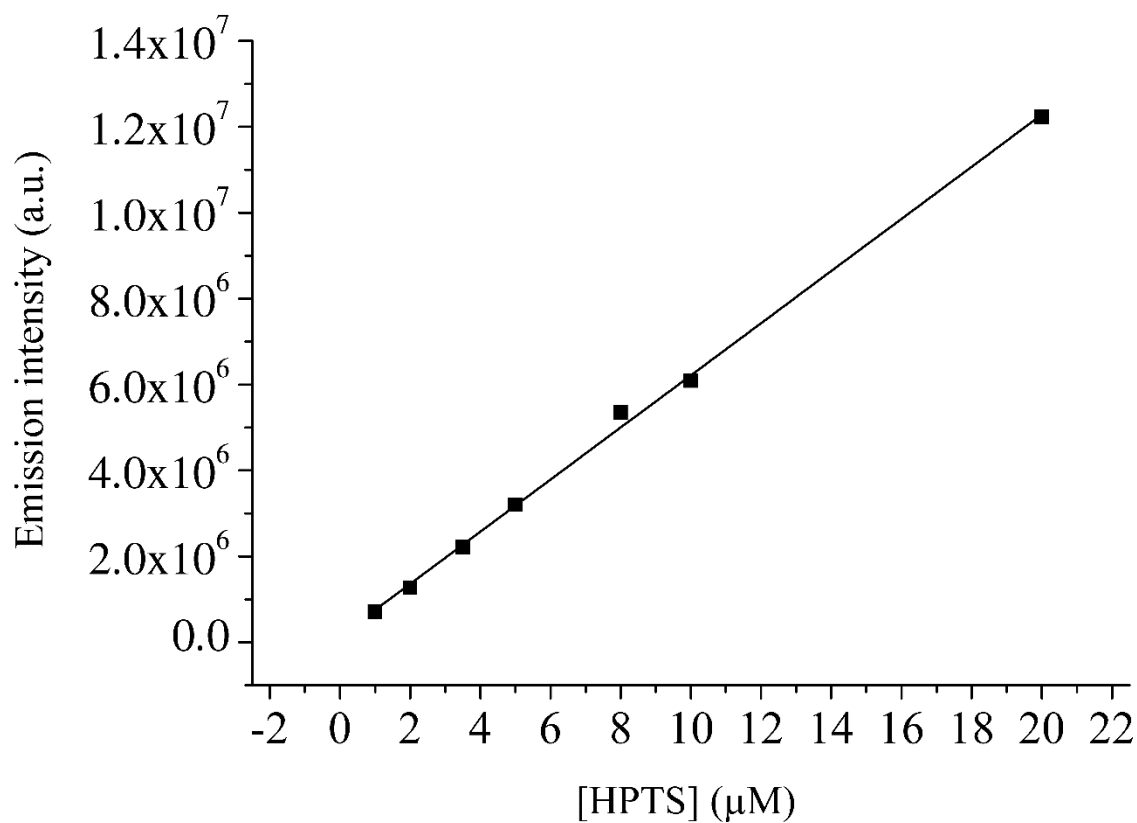

Figure S2. Focus on the range 1  $\mu\text{M}$  to 20  $\mu\text{M}$ .

**Table S2.** Parameters of the exponential fitting.

|                       | <b>y0</b>             | <b>A</b>              | <b>R0</b>              | <b>Reduced Chi-Sqr</b> | <b>Adj. R-Square</b> |
|-----------------------|-----------------------|-----------------------|------------------------|------------------------|----------------------|
| <b>Value</b>          | 1.43x10 <sup>8</sup>  | -1.43x10 <sup>8</sup> | -4.32x10 <sup>-3</sup> | 3.66x10 <sup>10</sup>  | 0.99996              |
| <b>Standard error</b> | 2.49x10 <sup>6</sup>  | 2.45x10 <sup>6</sup>  | 1.12x10 <sup>-4</sup>  |                        |                      |
| <b>Equation</b>       | $Y = y_0 + Ae^{R_0x}$ |                       |                        |                        |                      |

**Table S3.** Parameters of the exponential fittings in Fig. 2A.

|                        |    | <b>Value</b>                          | <b>Standard Error</b> |
|------------------------|----|---------------------------------------|-----------------------|
| <b>Na<sup>+</sup></b>  | y0 | 1.45x10 <sup>7</sup>                  | 1.19x10 <sup>6</sup>  |
|                        | A  | -1.15x10 <sup>7</sup>                 | 1.13x10 <sup>6</sup>  |
|                        | R0 | -6.62298                              | 2.33x10 <sup>11</sup> |
| <b>R<sup>2</sup></b>   |    | 0.98248                               |                       |
| <b>Ca<sup>2+</sup></b> | y0 | 2.48x10 <sup>7</sup>                  | 1.93x10 <sup>6</sup>  |
|                        | A  | -2.15x10 <sup>7</sup>                 | 2.05x10 <sup>6</sup>  |
|                        | R0 | -9.5933                               | 2.3314                |
| <b>R<sup>2</sup></b>   |    | 0.96894                               |                       |
| <b>La<sup>3+</sup></b> | y0 | 2.41x10 <sup>7</sup>                  | 3.29x10 <sup>5</sup>  |
|                        | A  | -2.14x10 <sup>7</sup>                 | 6.41x10 <sup>5</sup>  |
|                        | R0 | -30.324                               | 2.748                 |
| <b>R<sup>2</sup></b>   |    | 0.9956                                |                       |
| <b>EQUATION</b>        |    | $y = y_0 + A \cdot e^{(R_0 \cdot x)}$ |                       |

**Table S4.** Parameters of the exponential fitting in Fig. 3B.

|                       | yo                   | A                     | R0                    | Reduced Chi-Sqr       | Adj. R-Square |
|-----------------------|----------------------|-----------------------|-----------------------|-----------------------|---------------|
| <b>Value</b>          | 1.94x10 <sup>7</sup> | -1.55x10 <sup>7</sup> | -0.00538              | 2.45x10 <sup>10</sup> | 0.99886       |
| <b>Standard error</b> | 252784.97            | 2.36x10 <sup>5</sup>  | 2.03x10 <sup>-4</sup> |                       |               |

**Table S5.** Parameters of the linear fitting in Fig. 3C.

|                       | Intercept | Slope                 | Adj. R-Square |
|-----------------------|-----------|-----------------------|---------------|
| <b>Value</b>          | 16.5678   | -0.0055               | 0.99905       |
| <b>Standard error</b> | 0.01027   | 5.67x10 <sup>-5</sup> |               |

**Table S6.** Parameters of the exponential fitting to determine HPTS concentration in solution of the sample.

|                       | yo                    | A                     | R0                    | Reduced Chi-Sqr       | Adj. R-Square |
|-----------------------|-----------------------|-----------------------|-----------------------|-----------------------|---------------|
| <b>Value</b>          | 6.84x10 <sup>7</sup>  | -6.83x10 <sup>7</sup> | -0.71                 | 4.64x10 <sup>10</sup> | 0.99991       |
| <b>Standard error</b> | 2.56x10 <sup>5</sup>  | 2.57x10 <sup>5</sup>  | 6.45x10 <sup>-3</sup> |                       |               |
| <b>Equation</b>       | $Y = y_0 + Ae^{R_0x}$ |                       |                       |                       |               |

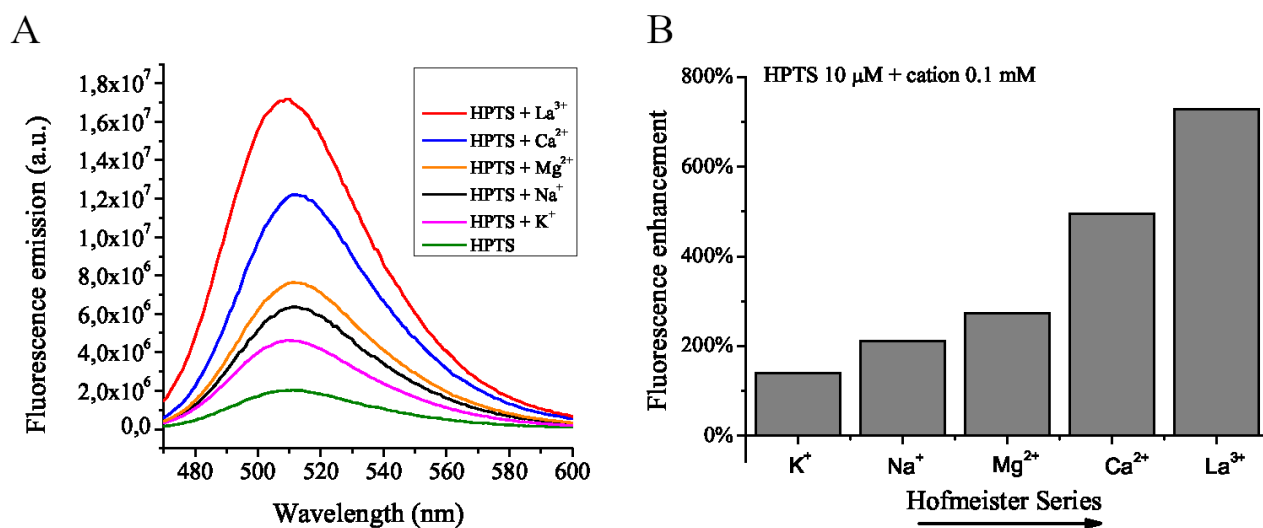

**Figure S3.** (A) Comparison of emission spectra for 0.1 mM of cations and 10 μM HPTS (pH=6.2±0.1), (B) Enhancement of fluorescence emission at  $\lambda=511$  nm upon excitation at  $\lambda=450$  nm.

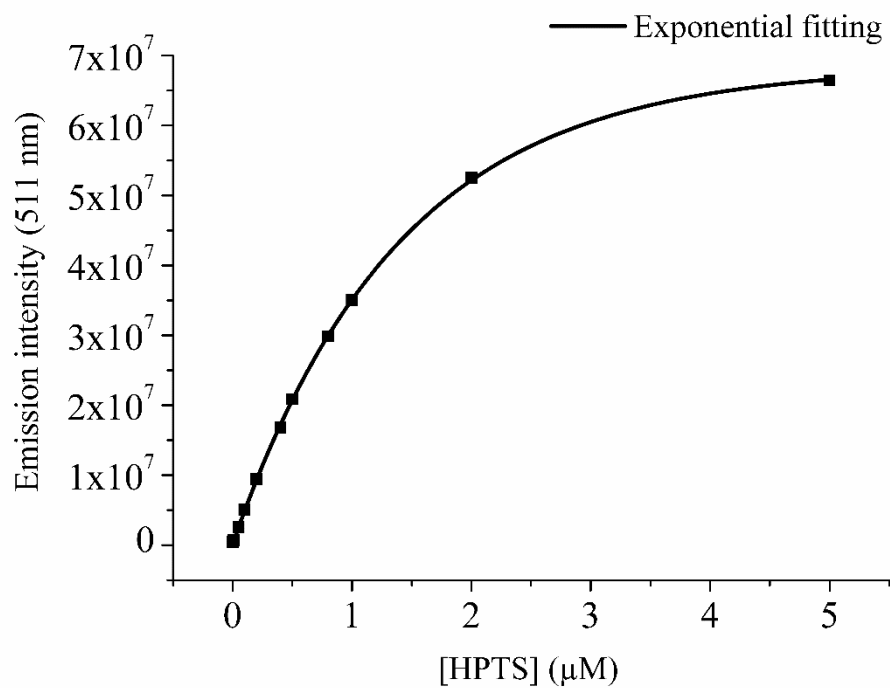

**Figure S4.** Calibration curve and exponential fitting for the quantification of the concentration of HPTS in the samples

**Figure S5.** Spectra acquired after cell lysis

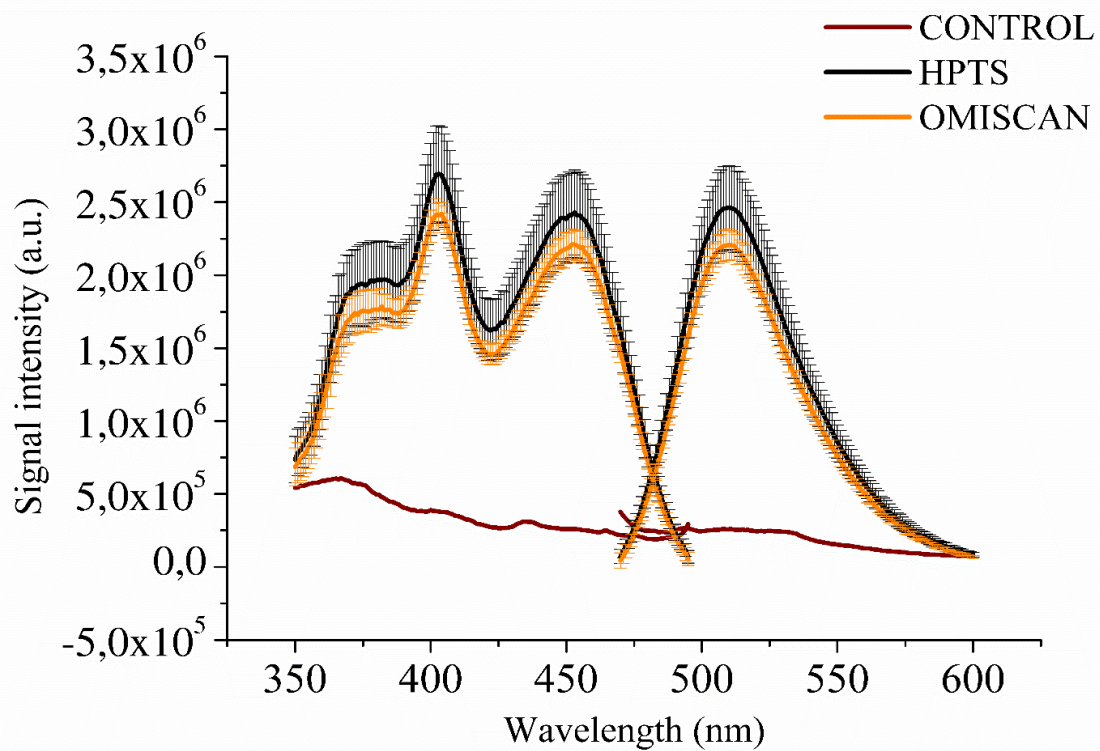

**Table S7.** Calculated HPTS concentration and the *per* cell content.

| SAMPLE    | Emission<br>(511 nm) | Cell number        | [HPTS]<br>( $\mu$ M)<br>in 3ml<br>solution | Moles<br>in 3ml<br>solution | Number of<br>HPTS<br>molecules per<br>cell | Moles of<br>HPTS<br>molecules per<br>cell |
|-----------|----------------------|--------------------|--------------------------------------------|-----------------------------|--------------------------------------------|-------------------------------------------|
| WHITE     | $2.59 \times 10^5$   | $2.20 \times 10^6$ | 0.0018                                     | $10^{-12}$                  | -                                          | -                                         |
| HPTS      | $2.46 \times 10^6$   | $1.82 \times 10^6$ | 0.047                                      | $1.41 \times 10^{-10}$      | $4.66 \times 10^7$                         | $7.74 \times 10^{-17}$                    |
| MAGNEVIST | $1.49 \times 10^6$   | $8.68 \times 10^5$ | 0.027                                      | $8.1 \times 10^{-11}$       | $5.61 \times 10^7$                         | $9.33 \times 10^{-17}$                    |
| OMNISCAN  | $2.20 \times 10^6$   | $1.34 \times 10^6$ | 0.042                                      | $1.26 \times 10^{-10}$      | $5.67 \times 10^7$                         | $9.42 \times 10^{-17}$                    |
| PROHANCE  | $1.64 \times 10^6$   | $1.24 \times 10^6$ | 0.03                                       | $9 \times 10^{-11}$         | $4.37 \times 10^7$                         | $7.26 \times 10^{-17}$                    |

Table S8. Calculated total Gadolinium concentration and the *per cell* content.

| SAMPLE    | Cell number        | [Gd] (mM)<br>in 3ml<br>solution | R1   | Error                 | Moles<br>in 3ml<br>solution | Number of Gd<br>atoms/molecules<br>per cell | Moles of Gd<br>atoms/molecules<br>per cell |
|-----------|--------------------|---------------------------------|------|-----------------------|-----------------------------|---------------------------------------------|--------------------------------------------|
| HPTS      | $1.82 \times 10^6$ | 0.018                           | 0.62 | $1.25 \times 10^{-3}$ | -                           | -                                           | -                                          |
| MAGNEVIST | $8.68 \times 10^5$ | 0.28                            | 2.44 | $4.5 \times 10^{-3}$  | $5.67 \times 10^{-8}$       | $3.93 \times 10^{10}$                       | $6.53 \times 10^{-14}$                     |
| OMNISCAN  | $1.34 \times 10^6$ | 0.49                            | 3.88 | $7.6 \times 10^{-3}$  | $9.88 \times 10^{-8}$       | $4.45 \times 10^{10}$                       | $7.39 \times 10^{-14}$                     |
| PROHANCE  | $1.24 \times 10^6$ | 0.54                            | 4.22 | $9 \times 10^{-3}$    | $1.08 \times 10^{-7}$       | $5.27 \times 10^{10}$                       | $8.76 \times 10^{-14}$                     |

Table S9. SMILES code of the molecules.



| MOLECULE   | SMILES CODE                                                                               |
|------------|-------------------------------------------------------------------------------------------|
| HPTS       | <chem>c1cc2c(cc(c3c2c4c1c(cc(c4cc3)S(=O)(=O)[O-])O)S(=O)(=O)[O-].[Na+].[Na+].[Na+]</chem> |
| MAGNEVIST® | <chem>[Gd+3].OC(=O)CN(CCN(CCN(CC(O)=O)CC([O-])=O)CC([O-])=O)CC([O-])=O</chem>             |
| OMNISCAN®  | <chem>[Gd+3].CNC(=O)CN(CCN(CCN(CC([O-])=O)CC(=O)NC)CC([O-])=O)CC([O-])=O</chem>           |
| PROHANCE®  | <chem>[Gd+3].CC(O)CN1CCN(CC([O-])=O)CCN(CC([O-])=O)CCN(CC([O-])=O)CC1</chem>              |
